# Supplementary material for: Molecular and biological characterization of a new strawberry Cytorhabdovirus
Source: Preprints.org preprint supplement (doi:10.20944/preprints201909.0220.v1), 2019-09-19
Supplement: Supplementary file 1 [file supplementary]

**Table S1: Symptoms and determination of StrV-1 genotypes using Sanger sequencing and RT-qPCR in strawberry plants from different localities of the Czech Republic (see map below)**

| Locality #    | Sample designation | Cultivar                           | Symptoms                          | RT-PCR assay & Sanger sequencing           |                                                 |                                                                           | RT-qPCR    |            |            |
|---------------|--------------------|------------------------------------|-----------------------------------|--------------------------------------------|-------------------------------------------------|---------------------------------------------------------------------------|------------|------------|------------|
|               |                    |                                    |                                   | Band of expected size, gel electrophoresis | StrV-1 genotype, if no secondary peaks detected | Number of detected genotypes, by multiple secondary peaks on chromatogram | StrV-1 (A) | StrV-1 (B) | StrV-1 (C) |
| West Bohemia  |                    |                                    |                                   |                                            |                                                 |                                                                           |            |            |            |
| 1             | 120/2017           | <i>F. ananassa</i> cv. Asia        | dwarf                             | +                                          | B                                               | <div><div></div></div> 1                                                  | -          | -          | -          |
|               | 121/2017           | <i>F. ananassa</i> cv. Asia        | leaf malformation                 | +                                          | B                                               | <div><div></div></div> 1                                                  | -          | -          | -          |
| 2             | 82-1/2017          | <i>F. ananassa</i> cv.Elkat        | irregular vein clearing, necrosis | +                                          | B                                               | <div><div></div></div> 1                                                  | -          | +          | -          |
|               | 82-2/2017          | <i>F. ananassa</i> cv.Elkat        | irregular vein clearing, necrosis | +                                          | B                                               | <div><div></div></div> 1                                                  | -          | +          | -          |
|               | 83/2017            | <i>F. ananassa</i> cv.Elkat        | irregular vein clearing, dwarf    | +                                          | B                                               | <div><div></div></div> 1                                                  | -          | +          | -          |
|               | 84/2017            | <i>F. ananassa</i> cv.Elkat        | dwarf                             | +                                          | B                                               | <div><div></div></div> 1                                                  | -          | +          | -          |
|               | 85/2017            | <i>F. vesca</i> cv. Rujana, garden | chlorotic rings, dwarf            | +                                          |                                                 | <div><div></div></div> 3                                                  | +          | +          | +          |
| South Bohemia |                    |                                    |                                   |                                            |                                                 |                                                                           |            |            |            |
| 3             | 86/2017            | <i>F. ananassa</i> cv.Elkat        | irregular vein clearing           | +                                          | B                                               | <div><div></div></div> 1                                                  | -          | +          | -          |
|               | 88/2017            | <i>F. ananassa</i> cv.Elkat        | dwarf                             | +                                          | B                                               | <div><div></div></div> 1                                                  | -          | +          | -          |
|               | 89/2017            | <i>F. ananassa</i> cv.Elkat        | irregular vein clearing           | +                                          | B                                               | <div><div></div></div> 1                                                  | -          | +          | -          |
|               | 102/2017           | <i>F. ananassa</i> cv.Elkat        | irregular vein clearing           | +                                          | B                                               | <div><div></div></div> 1                                                  | -          | +          | -          |
|               | 103/2017           | <i>F. ananassa</i> cv.Elkat        | dwarf                             | +                                          | B                                               | <div><div></div></div> 1                                                  | -          | +          | -          |
|               | 138/2017           | <i>F. ananassa</i> cv.Elkat        | irregular vein clearing           | +                                          | B                                               | <div><div></div></div> 1                                                  | -          | +          | -          |
| 4             | 43/2017            | <i>F. ananassa</i> cv.Rumba        | yellow dots                       | +                                          | B                                               | <div><div></div></div> 1                                                  | -          | -          | -          |
| 5             | 68/2017            | <i>F. ananassa</i> cv.Sonáta       | dwarf                             | +                                          |                                                 | <div><div></div></div> 2                                                  | +          | -          | -          |
|               | 70/2017            | <i>F. ananassa</i> cv.Karmen       | leaf reddening                    | +                                          |                                                 | <div><div></div></div> 3                                                  | +          | -          | -          |
|               | 72/2017            | <i>F. ananassa</i> cv.Sonáta       | dwarf, yellowing                  | +                                          |                                                 | <div><div></div></div> 2                                                  | +          | -          | -          |
|               | 74/2017            | <i>F. ananassa</i>                 | dwarf                             | +                                          |                                                 | <div><div></div></div> 3                                                  | +          | -          | -          |
|               | 77/2017            | <i>F. ananassa</i> cv.Salza        | dwarf                             | +                                          |                                                 | <div><div></div></div> 3                                                  | +          | -          | -          |
|               | 63/2017            | <i>F. ananassa</i> cv.Induka       | leaf reddening                    | +                                          |                                                 | <div><div></div></div> 3                                                  | -          | -          | -          |
| 7             | 48/2016            | <i>F. vesca</i> , wild plant       | chlorotic dots, mosaic            | +                                          |                                                 | <div><div></div></div> 2                                                  | +          | +          | -          |
|               | 21/2017            | <i>F. vesca</i> , wild plant       | light green mosaic                | +                                          |                                                 | <div><div></div></div> 2                                                  | +          | -          | +          |
|               | 22/2017            | <i>F. vesca</i> , wild plant       | light green mosaic, circles       | +                                          | A                                               | <div><div></div></div> 1                                                  | +          | -          | -          |
|               | 196/2017           | <i>F. ananassa</i> , garden        | irregular vein clearing           | +                                          |                                                 | <div><div></div></div> 2                                                  | +          | +          | +          |
|               | 197/2017           | <i>F. ananassa</i> , garden        | no                                | +                                          |                                                 | <div><div></div></div> 2                                                  | +          | +          | +          |
|               | 121/2019           | <i>F. ananassa</i> , garden        | no                                | +                                          |                                                 | <div><div></div></div> 2                                                  | +          | +          | +          |
|               | 123/2019           | <i>F. vesca</i> , wild plant       | chlorotic dots, mosaic            | +                                          |                                                 | <div><div></div></div> 3                                                  | +          | -          | -          |
|               | 34/2016            | <i>F. ananassa</i> , garden        | dwarf                             | +                                          | A                                               | <div><div></div></div> 1                                                  | +          | -          | -          |
| 8             | B36/2016           | <i>F. ananassa</i> , garden        | dwarf                             | +                                          | B                                               | <div><div></div></div> 1                                                  | -          | -          | +          |
|               | 37/2016            | <i>F. ananassa</i> , garden        | dwarf                             | +                                          |                                                 | <div><div></div></div> 3                                                  | +          | -          | -          |
|               | 41B/2016           | <i>F. ananassa</i> , garden        | dwarf                             | +                                          | A                                               | <div><div></div></div> 1                                                  | +          | +          | +          |
|               | 42B/2016           | <i>F. ananassa</i> , garden        | dwarf                             | +                                          | A                                               | <div><div></div></div> 1                                                  | +          | -          | +          |
|               | 45B/2016           | <i>F. ananassa</i> , garden        | dwarf                             | +                                          | A                                               | <div><div></div></div> 1                                                  | +          | -          | -          |
|               | 24/2017            | <i>F. ananassa</i> , garden        | irregular vein clearing           | +                                          |                                                 | <div><div></div></div> 3                                                  | +          | +          | +          |
| 9             | 17/2017            | <i>F. ananassa</i> , garden        | epinasty                          | +                                          | B                                               | <div><div></div></div> 1                                                  | -          | -          | -          |
| 10            | 7/2017             | <i>F. vesca</i> cv. Rujana, garden | dwarf, mosaic, necrosis           | +                                          |                                                 | <div><div></div></div> 3                                                  | +          | +          | -          |
| 11            | 37/2017            | <i>F. ananassa</i> cv.Darselekt    | dwarf                             | +                                          |                                                 | <div><div></div></div> 2                                                  | +          | -          | -          |

**Legend**

+ positive  
- negative

Table S1, continue

| Locality #    | Sample designation | Cultivar                     | Symptoms                          | RT-PCR assay & Sanger sequencing           |                                                 |                                                                           | RT-qPCR    |            |            |  |
|---------------|--------------------|------------------------------|-----------------------------------|--------------------------------------------|-------------------------------------------------|---------------------------------------------------------------------------|------------|------------|------------|--|
|               |                    |                              |                                   | Band of expected size, gel electrophoresis | StrV-1 genotype, if no secondary peaks detected | Number of detected genotypes, by multiple secondary peaks on chromatogram | StrV-1 (A) | StrV-1 (B) | StrV-1 (C) |  |
| East Bohemia  |                    |                              |                                   |                                            |                                                 |                                                                           |            |            |            |  |
| 13            | 27/2016            | <i>F. ananassa</i> cv.Elkat  | irregular vein clearing, necrosis | +                                          | B                                               | 1                                                                         | -          | +          | -          |  |
| 14            | 20/2016            | <i>F. ananassa</i>           | light green mosaic                | +                                          | B                                               | 1                                                                         | -          | +          | -          |  |
|               | 24/2016            | <i>F. ananassa</i>           | yellowing, narrowed leaves        | +                                          |                                                 | 3                                                                         | +          | +          | +          |  |
|               | 26A/2016           | <i>F. ananassa</i>           | dwarf                             | +                                          | B                                               | 1                                                                         | -          | +          | -          |  |
| South Moravia |                    |                              |                                   |                                            |                                                 |                                                                           |            |            |            |  |
| 15            | 174 (1)/2017       | <i>F. ananassa</i> cv.Prima  | yellowing                         | +                                          | B                                               | 1                                                                         | -          | -          | -          |  |
|               | 174 (2)/2017       | <i>F. ananassa</i> cv.Prima  | yellowing                         | +                                          | B                                               | 1                                                                         | -          | +          | -          |  |
|               | 181/2017           | <i>F. ananassa</i> cv.Elkat  | yellow dots                       | +                                          | B                                               | 1                                                                         | -          | +          | -          |  |
|               | 183/2017           | <i>F. ananassa</i> cv.Elkat  | irregular vein clearing           | +                                          | B                                               | 1                                                                         | -          | +          | -          |  |
| 16            | 152/2017           | <i>F. ananassa</i> cv.Karmen | dwarf                             | +                                          | A                                               | 1                                                                         | +          | -          | -          |  |
|               | 153/2017           | <i>F. ananassa</i> cv.Karmen | dwarf                             | +                                          |                                                 | 3                                                                         | -          | -          | +          |  |
| 17            | 142/2017           | <i>F. ananassa</i> cv.Asia   | dwarf                             | +                                          | B                                               | 1                                                                         | -          | -          | -          |  |
|               | 147/2017           | <i>F. ananassa</i> cv.Asia   | yellowing                         | +                                          | C                                               | 1                                                                         | -          | -          | +          |  |

Map of the Czech Republic with locations of strawberry samples

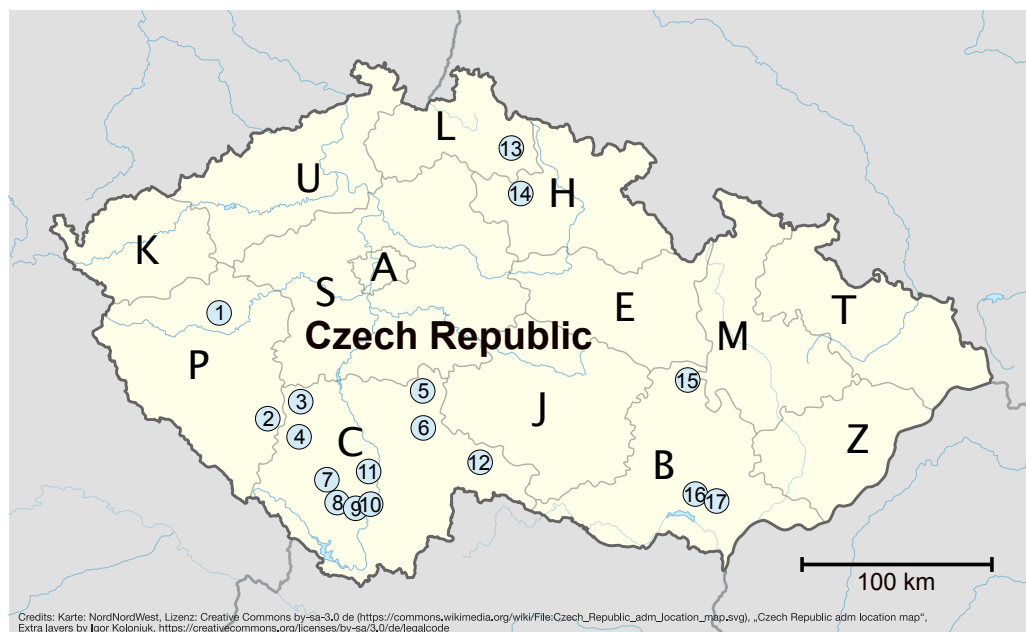

Legend

+ positive  
 - negative

A – Prague  
 B – South Moravian Region  
 C – South Bohemian Region  
 E – Pardubice Region  
 H – Hradec Králové Region  
 J – Vysočina Region  
 K – Carlsbad Region  
 L – Liberec Region  
 M – Olomouc Region  
 P – Plzeň Region  
 S – Central Bohemian Region  
 T – Moravian-Silesian Region  
 U – Ústí nad Labem Region  
 Z – Zlín Region
