# Supplementary material for: Molecular and biological characterization of a new strawberry Cytorhabdovirus
Source: Preprints.org preprint supplement (doi:10.20944/preprints201909.0220.v1), 2019-09-19
Supplement: Supplementary file 1 [file Supplementary Table S2 - List if primers used in the study.xlsx]

## Sheet: Supplementary Table 1
Primer	Genotype of StrV-1 ČRM1	Usage	Sequence, 5'-3'	Position*	Direction*	qPCR efficiency and R2, if appliable
1965	A	3'-RACE	GTTCAACATGGACACGACTAAG	394 - 415	reverse
1967	A	3'-RACE	CTTCATCATCATTCTGCAAGA	621 - 641	reverse
1319	A	3'-RACE	TCAGCACAGATGTATGAGTA	686 - 705	reverse
1963	AC	3'-RACE	TTTGTTGATCATGGCTGTGTGT	193 - 214	reverse
1716	B	3'-RACE	AGCAATATAAATTACTGAAAGACTATTC	128 - 155	reverse
1962	B	3'-RACE	GCCATAGCGAAGGATGCTAA	167 - 186	reverse
1690	B	3'-RACE	TCTGTCTTCTTCTTCTCCGG	639 - 658	reverse
1689	B	3'-RACE	TTCAATCCATCGTGCACATT	737 - 756	reverse
1688	B	3'-RACE	CCAGGTGGTGGTTAACTCCG	870 - 889	reverse
1964	C	3'-RACE	CCAGATTCAACATGGATATGACCAG	395 - 419	reverse
1966	C	3'-RACE	TTCATCATCATCAGGCATCA	621 - 640	reverse
1381	A	5'-RACE	CCAGCCCTTTCTTTTGAGAT	13299 - 13318	reverse
1956	A	5'-RACE	ACCTCGAAATGGTCTCTTCCTT	13624 - 13645	forward
1957	A	5'-RACE	ACTCGTCAGGTCCTGGAAGT	13698 - 13717	forward
1960	A	5'-RACE	TGTTCCTTTGATAGTATAGTCAACTAC	13938 - 13964	forward
1712	ABC	5'-RACE	ATTTATAAACGAATCTGGGTTAAGGA	14078 - 14103	reverse
1664	B	5'-RACE	GTGGGATCCGTGGTTGGTT	13157 - 13175	forward
1961	B	5'-RACE	GGGGAACAACTGGCTCTCAA	13534 - 13553	forward
1665	B	5'-RACE	AACCGTTGTGTTGAGAAGTC	13571 - 13590	forward
1666	B	5'-RACE	TGTTGCTCTCCTCATACTATCA	13750 - 13771	forward
1955	C	5'-RACE	CTTGAAATAGTCTTCTCTTTCA	13715 - 13736	forward
1958	C	5'-RACE	GAGACATCCGTTCTCTGAAATAA	13815 - 13837	forward
1959	C	5'-RACE	GGGACGGTCAGGACCTTAC	13961 - 13979	forward
1589	ABC	cDNA synthesis for RT-qPCR	GAGGTTCTTATTCAGGTTCCG	1779 - 1799	forward
StrV1.2f	ABC	Detection	GAGATGGAYAGTCCTCTGACA	1058 - 1078	forward
StrV1.1f	ABC	Detection	AARATYTGTGTTCCTCTGCTATA	1208 - 1230	forward
StrV1.7r	ABC	Detection	ATACTTCCAGATTTGTCATC	1385 - 1404	reverse
1662	A	Sequencing	TGCTACAAATAACCGTATACA	9083 - 9103	forward
1710	A	Sequencing	TAGATCTCCGGTTGACGATG	12992 - 13011	forward
StrV1.2r	ABC	Sequencing	TGCYCCTTCMGGACTGA	5929 - 5945	forward
StrV1.1r	ABC	Sequencing	TCCCTAAAATATGYTCCACACT	6044 - 6065	reverse
1656	ABC	Sequencing	CCTCACTCGTATGCTCATAATG	12217 - 12238	forward
1349	ABC	Sequencing	ACCAGCTTCACCTCCCATTG	13060 - 13079	reverse
1638	B	Sequencing	GGCTCCACACTCTCGCATAC	1162 - 1181	reverse
1640	B	Sequencing	CGACACGATTTAGGACTTCTTTC	1321 - 1343	reverse
1709	B	Sequencing	GCTCCGATAGATATCAGGCTTAA	12965 - 12987	forward
1713	C	Sequencing	TTTCTATCAGGATGTCTAGTTGTTTG	1124 - 1149	reverse
1714	C	Sequencing	TTGGATTGGAGCTGGGCAAA	1190 - 1209	reverse
2193	C	Sequencing	ATGGAGAGAACCCTTTCTGA	1367 - 1386	forward
1686	C	Sequencing	ACTCACATCTGCAAGGCTCC	7233 - 7252	forward
1708	C	Sequencing	GATAAGTGCCGAATTTGGAT	8118 - 8137	reverse
1685	C	Sequencing	ATTGCATTGAGGGACCGGTC	8404 - 8423	reverse
1586	C	Sequencing	TCCGTAAACTTCGTATACAC	9088 - 9107	reverse
1890	C	Sequencing	GACCTGTCGGATAATTTAGCG	12676 - 12696	forward
1891	C	Sequencing	GAACATTCACTCACGTGTACTA	12830 - 12851	forward
1711	C	Sequencing	ACTTTTCGCCATTGCTGTGT	12948 - 12967	forward
2071	A	variant-specific RT-qPCR	TGCTCCCAGACAGAGACTCAGA	1924 - 1945	forward	E = 101.5 % R2 = 0.996
2068	A	variant-specific RT-qPCR	CGAACGAACCATTTGATAGAAGAC	2072 - 2095	reverse
2072	B	variant-specific RT-qPCR	AGTAAGAGCATACCCACAGTACT	1884 - 1906	forward	E = 96.4 % R2 = 0.999
2070	B	variant-specific RT-qPCR	GGTTCTCCATCTGCTTCGTA	2009 - 2028	reverse
2073	C	variant-specific RT-qPCR	TCCGCATTACTCAGAGGCA	1893 - 1911	forward	E = 96.2 % R2 = 0.998
2069	C	variant-specific RT-qPCR	TCTTGCTGAGTCTGAACACCT	2021 - 2041	reverse
* - position and direction related to the strand, which is complementary to viral genomic RNA
