# Supplementary material for: Molecular and biological characterization of a new strawberry Cytorhabdovirus
Source: Preprints.org preprint supplement (doi:10.20944/preprints201909.0220.v1), 2019-09-19
Supplement: Supplementary file 2 [file supplementary]

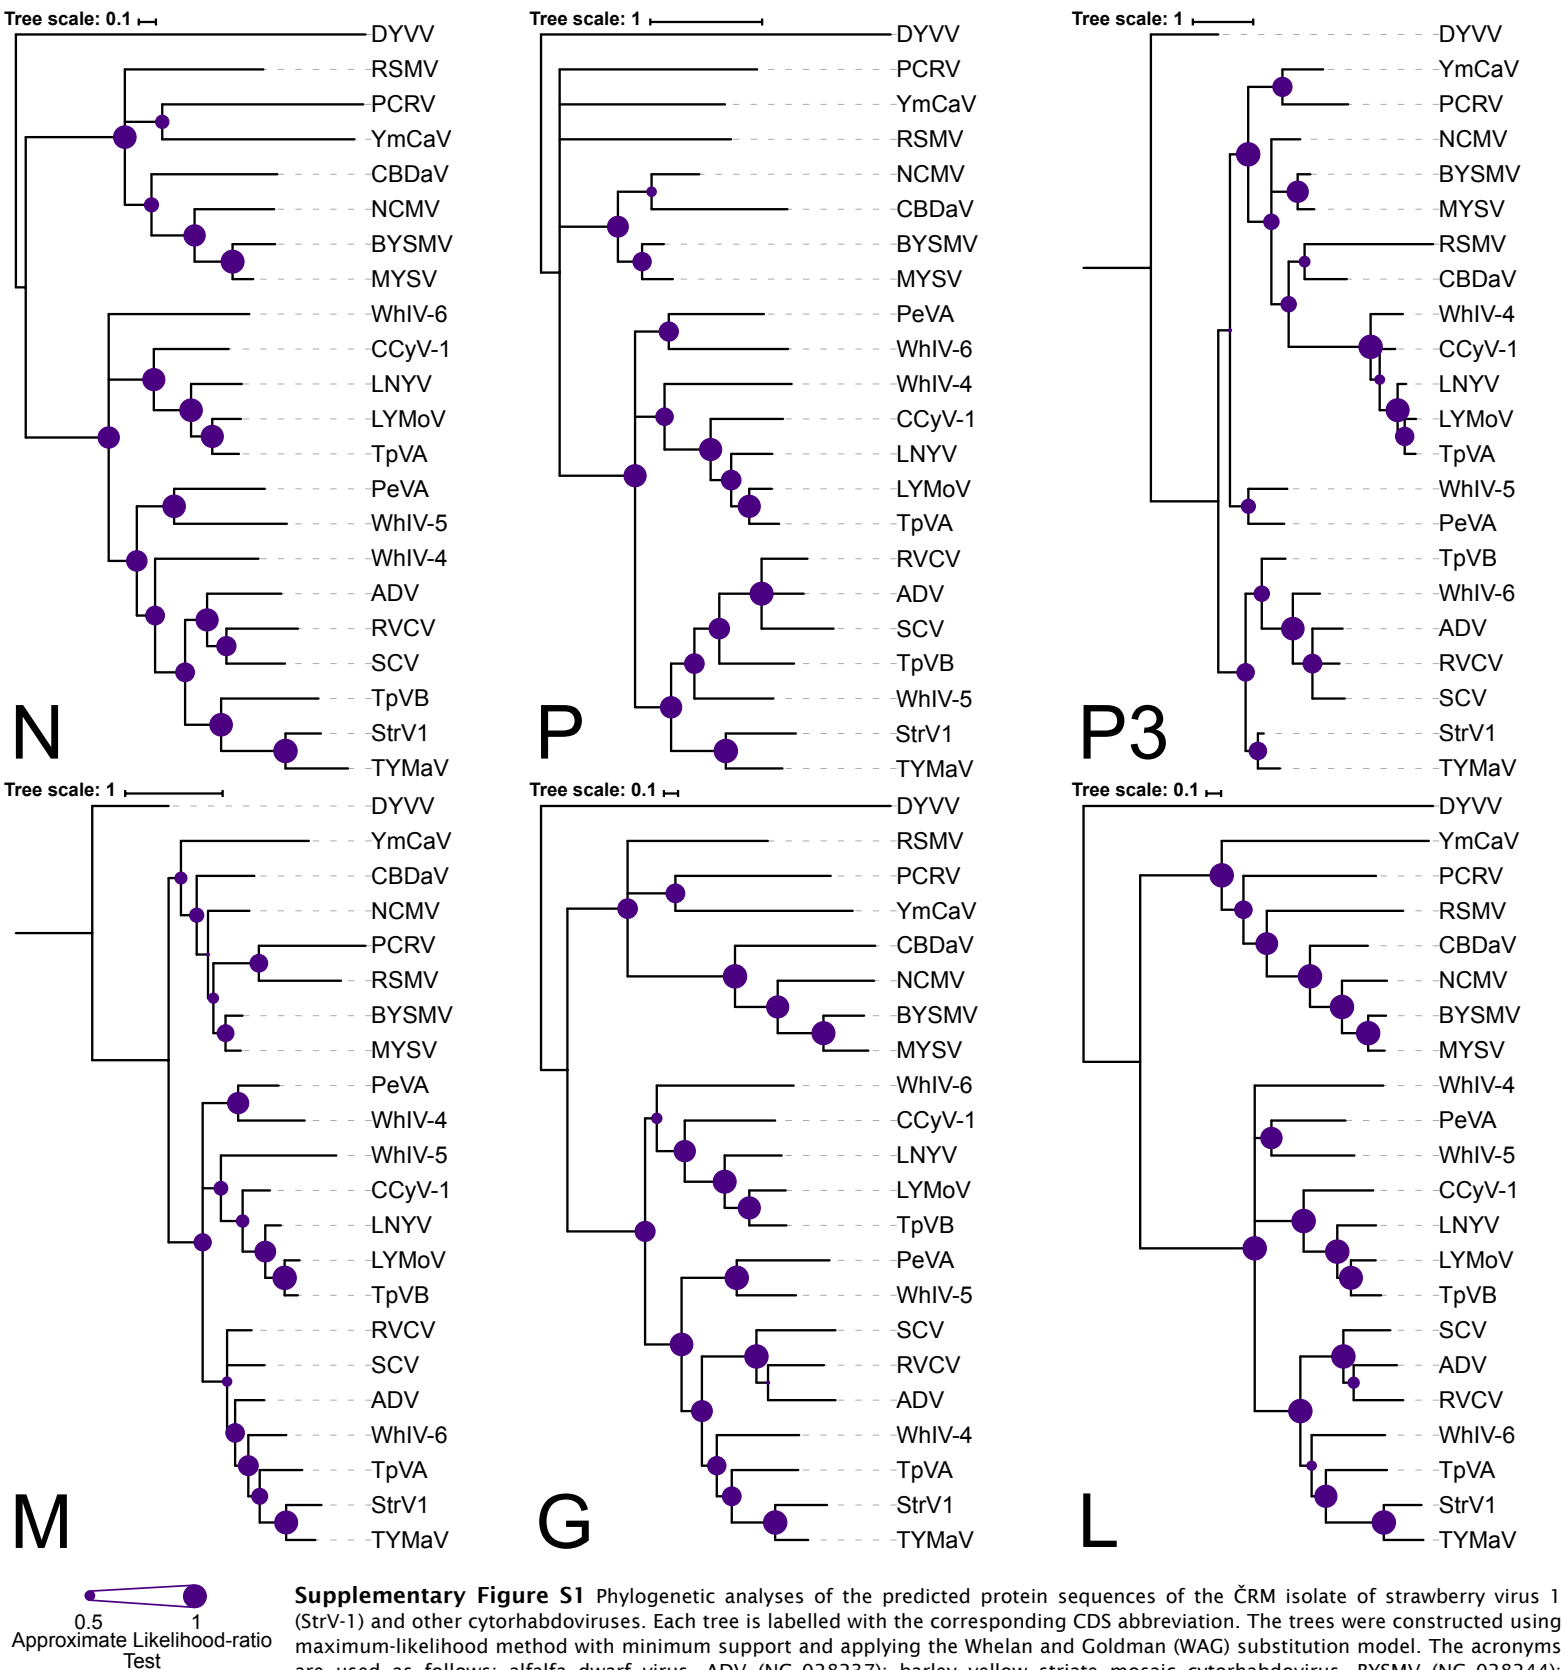

**Supplementary Figure S1** Phylogenetic analyses of the predicted protein sequences of the ČRM isolate of strawberry virus 1 (StrV-1) and other cytorhabdoviruses. Each tree is labelled with the corresponding CDS abbreviation. The trees were constructed using maximum-likelihood method with minimum support and applying the Whelan and Goldman (WAG) substitution model. The acronyms are used as follows: alfalfa dwarf virus, ADV (NC\_028237); barley yellow striate mosaic cytorhabdovirus, BYSMV (NC\_028244); cabbage cytorhabdovirus 1, CCyV-1 (KY810772); colocasia bobone disease-associated virus, CBDaV (NC\_034551); datura yellow vein nucleorhabdovirus, DYVV (NC\_028231); lettuce necrotic yellows virus, LNYV (NC\_007642); lettuce yellow mottle virus, LYMoV (NC\_011532); maize yellow triate virus, MYSV (KY884303); northern cereal mosaic cytorhabdovirus, NCMV (NC\_002251); papaya cytorhabdovirus, PCRV (KY366322); Persimmon virus A, PeVA (NC\_018381); raspberry vein chlorosis virus, RVCV (MK257717); rice tripe mosaic virus, RSMV (NC\_040786); strawberry crinkle cytorhabdovirus, SCV (MH129615); tomato yellow mottle-associated virus, TYMaV (NC\_034240); Trifolium pratense virus A, TpVA (MH982250); Trifolium pratense virus B, TpVB (MH982249); Wuhan Insect virus 4, WhIV-4 (NC\_031225); Wuhan Insect virus 5, WhIV-5 (NC\_031227); Wuhan Insect virus 6, WhIV-6 (NC\_031232); yerba mate chlorosis-associated virus, YmCaV (KY366322). A plant-infecting nucleorhabdovirus, DYVV, was used as an outgroup. Scale bars refer to a phylogenetic distance expressed in aminoacid substitutions per site. Support values are represented graphically.
