# Supplementary material for: Molecular and biological characterization of a new strawberry Cytorhabdovirus
Source: Preprints.org preprint supplement (doi:10.20944/preprints201909.0220.v1), 2019-09-19
Supplement: Supplementary file 2 [file Supplementary Table S3 - Simultaneous Aphis ruborum-mediated transmission of three StrV-1 genotypes transmitted from F. ananassa cv. . ran to herbaceous hosts.xlsx]

## Sheet: List1
Host plant	Strawberry virus 1 genotype	No. of plants
	A B C
Nicotiana benthamiana DCL 2/4i	+	2
Nicotiana benthamiana DCL 2/4i	+ +	1
Nicotiana glutinosa	+ +	1
Nicotiana occidentalis 37B	+	1
Nicotiana occidentalis 37B	+ +	5
Nicotiana occidentalis 37B	+ +	1
Supplementary Table S3
Simultaneous Aphis ruborum-mediated transmission of three strawberry virus 1 genotypes transmitted from Fragaria ananassa cv. Čačanská raná to herbaceous host plants
