# Supplementary material for: Molecular and biological characterization of a new strawberry Cytorhabdovirus
Source: Preprints.org preprint supplement (doi:10.20944/preprints201909.0220.v1), 2019-09-19
Supplement: Supplementary file 3 [file Supplementary Table S4 - Graft-mediated transmission of StrV-1 genotypes to F. vesca indicator clones.xlsx]

## Sheet: Sheet1
F. vesca indicator clone	StrV-1 genotype			Symptoms
	A	B	C
Alpine 1 30.5.19	-	+	-	no
Alpine 2 21.5.19	+	+	+	no
Alpine 3 15.5.19	+	+	+	VC, MCL
Alpine 3 21.5.19	+	+	+	no
Alpine 5 21.5.19	+	+	+	no
Alpine 1 30.7.19_ HC	-	-	-	no
Alpine 2 30.7.19_ HC	-	-	-	no
Alpine 3 30.7.19_HC	-	-	-	no
EMC 1 03.07.19	+	+	+	CS, CD
EMC 4 03.07.19	-	+	-	no
EMC 5 03.07.19	+	+	+	no
EMC 6 02.07.19	+	+	+	CD
EMC 6 03.07.19	+	+	+	VC, CD
EMC 4 11.07.19_HC	-	-	-	CD
EMK 2 04.07.19	+	+	+	no
EMK 3 04.07.19	+	-	+	VC
EMK 4 04.07.19	+	+	+	CD
EMK 5 11.07.19_HC	-	-	-	CD
FV-72 1 02.07.19	+	+	+	no
FV-72 2 02.07.19	+	+	+	VN
FV-72 3 02.07.19	+	+	+	CS
FV-72 4 01.07.19	+	+	+	CS
FV-72 4 02.07.19	+	+	+	CS
FV-72 5 01.07.19	+	+	+	CS
FV-72 3 11.07.19_HC	-	-	-	no
UC-6 3 10.07.19	+	+	+	CS,VC
UC-6 4 10.07.19	+	+	+	VC
UC-6 5 09.07.19	+	-	+	no
UC-6 5 10.07.19	+	+	+	VC,VN
UC-6 6 09.07.19	+	+	+	CS
UC-6 2 11.07.19_HC	-	-	-	no
CS - chlorotic sectors, CD - chlorotic dots, HC - healthy control, MCL - multiplication of calyx leaves, VC - vein clearing, VN - vein necrosis
Supplementary Table S4: Graft-mediated transmission of StrV-1 genotypes to Fragaria vesca indicator clones
